# Supplementary material for: BiFusionPathoNet: fusion network for drug-resistant bacteria identification via optical scattering patterns
Source: Royal Society of Chemistry journal article supplement (doi:10.1039/d4ay02074j), 2025-01-01
Supplement: d4ay02074j1.pdf [file d4ay02074j1.pdf]

## Supplementary information

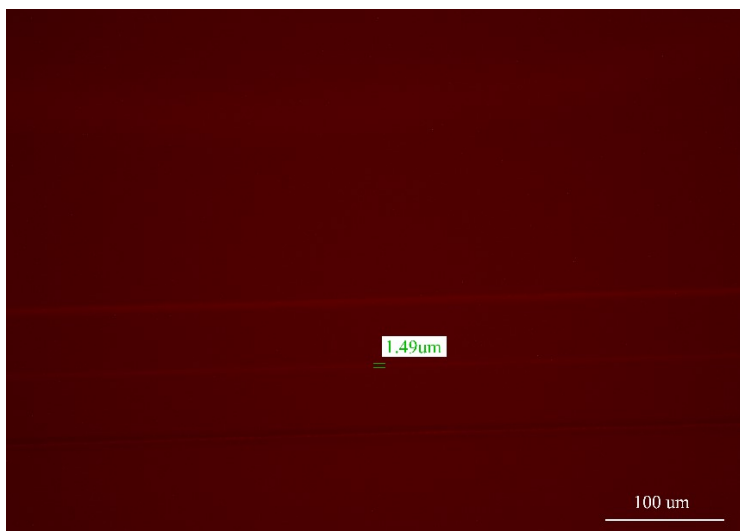

**Figure S1.** Microscopic view of focusing result of sheath flow microfluidic chip.

|             | <i>MRSA</i> | <i>MSSA</i> |
|-------------|-------------|-------------|
| <i>MRSA</i> | 2244        | 448         |
| <i>MSSA</i> | 480         | 2212        |

**Figure S2.** ResistNet's confusion matrix on the test set.

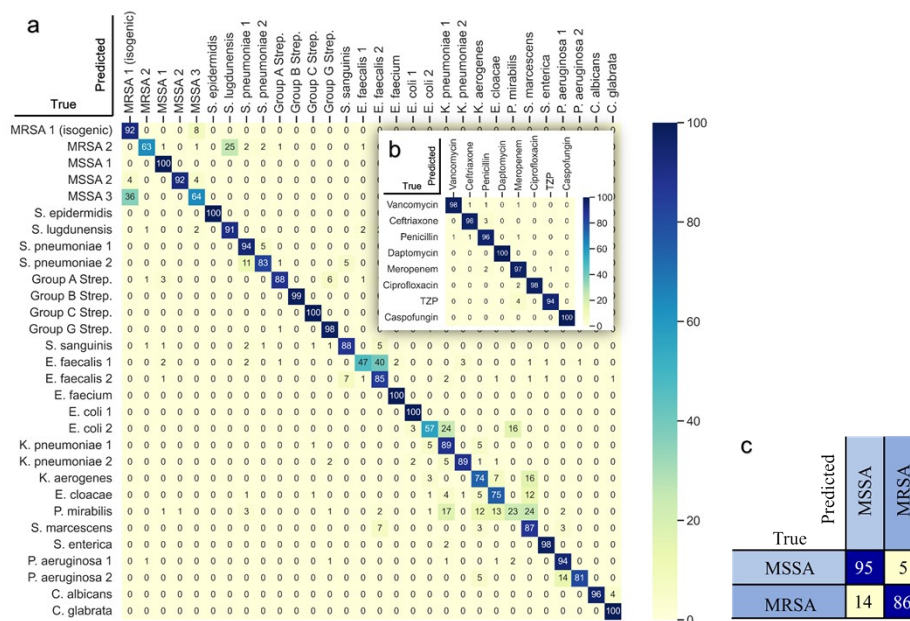

**Figure S3.** Confusion matrix of test results using SERB-CNN on the reference dataset (a) Prediction results for 20 strains (b) Corresponding empirical treatment prediction results (c) MRSA/MSSA resistance prediction results.

|             |             |             |
|-------------|-------------|-------------|
|             | <i>MRSA</i> | <i>MSSA</i> |
| <i>MRSA</i> | 2113        | 76          |
| <i>MSSA</i> | 57          | 1914        |

**Figure S4.** BiFusionPathoNet results confusion matrix.

**Table S1.** Details of the 20 strains used to construct the fine-tuning and testing dataset

| Species               | Figure label | Isolate code | Source          |
|-----------------------|--------------|--------------|-----------------|
| Staphylococcus aureus | MRSA 1       | ATCC43300    | QC              |
| Staphylococcus aureus | MRSA 2       | 13-12        | Sputum          |
| Staphylococcus aureus | MRSA 3       | 13-57        | Sputum          |
| Staphylococcus aureus | MRSA 4       | 13-87        | Sputum          |
| Staphylococcus aureus | MRSA 5       | 14-20        | Sputum          |
| Staphylococcus aureus | MRSA 6       | 3022         | Blood           |
| Staphylococcus aureus | MRSA 7       | 3036         | Hydroperitoneum |
| Staphylococcus aureus | MRSA 8       | 3064         | Blood           |
| Staphylococcus aureus | MRSA 9       | 3116         | Exudate         |
| Staphylococcus aureus | MRSA 10      | 3253         | Blood           |
| Staphylococcus aureus | MSSA 1       | ATCC6538     | QC              |
| Staphylococcus aureus | MSSA 2       | 10-49        | Sputum          |
| Staphylococcus aureus | MSSA 3       | 10-98        | Sputum          |
| Staphylococcus aureus | MSSA 4       | 3027         | Sputum          |
| Staphylococcus aureus | MSSA 5       | 3028         | Exudate         |
| Staphylococcus aureus | MSSA 6       | 3032         | Emphysema       |
| Staphylococcus aureus | MSSA 7       | 3060         | Emphysema       |
| Staphylococcus aureus | MSSA 8       | 3072         | Secretion       |
| Staphylococcus aureus | MSSA 9       | 3141         | Sputum          |
| Staphylococcus aureus | MSSA 10      | 3169         | Secretion       |
